1 **Chronic infection of adult zebrafish with rough or smooth variant *Mycobacterium abscessus***  
2 **causes necrotising inflammation and differential activation of host immunity**

3

4 Elinor Hortle<sup>1,2\*</sup>, Julia Y Kam<sup>1\*</sup>, Elizabeth Krogman<sup>1\*</sup>, Sherridan E Warner<sup>1,2</sup>, Pradeep  
5 Manuneedhi Cholan<sup>1</sup>, Kazu Kikuchi<sup>3,4</sup>, James A Triccas<sup>2</sup>, Warwick J Britton<sup>1,2</sup>, Matt D Johansen<sup>5</sup>,  
6 Laurent Kremer<sup>5,6</sup>, Stefan H Oehlers<sup>1,2#</sup>

7

8 1 Tuberculosis Research Program at Centenary Institute, The University of Sydney, Camperdown  
9 NSW Australia

10 2 The University of Sydney, Faculty of Medicine and Health & Marie Bashir Institute,  
11 Camperdown NSW Australia

12 3 Developmental and Stem Cell Biology Division, Victor Chang Cardiac Research Institute,  
13 Darlinghurst, NSW Australia

14 4 St. Vincent's Clinical School, University of New South Wales, Kensington, NSW 2052, Australia

15 5 Centre National de la Recherche Scientifique UMR 9004, Institut de Recherche en Infectiologie  
16 de Montpellier (IRIM), Université de Montpellier, 1919 Route de Mende, 34293, Montpellier,  
17 France.

18 6 INSERM, IRIM, 34293 Montpellier, France.

19

20 \*These authors contributed equally and are listed in alphabetical order.

21

22 # Corresponding author: Dr Stefan Oehlers, [stefan.oehlers@sydney.edu.au](mailto:stefan.oehlers@sydney.edu.au)

23

24 Author contributions

25 EH: qPCR analyses; JK: histological analysis; EK: dose finding, survival experiments, histological  
26 analysis; SW: CFU recovery assays; PMC: histological analysis; KK: provided reagents; JAT &  
27 WJB: supervision of study; MDJ: conceived study, supervision of study, wrote manuscript; LK:  
28 conceived study, provided reagents, supervision of study, wrote manuscript; SHO: conceived study,  
29 performed experiments, supervision of study, wrote manuscript.

30

31 Keywords: non-tuberculous mycobacterium, rapid-growing mycobacteria, animal model, zebrafish,  
32 glycopeptidolipids

33

34 **Abstract**

35 Infections caused by *Mycobacterium abscessus* are increasing in prevalence within patient groups  
36 with respiratory comorbidities including Cystic Fibrosis or Chronic Obstructive Pulmonary Disease.  
37 Initial colonisation by the smooth colony *M. abscessus* (S) can be followed by an irreversible  
38 genetic switch into a highly inflammatory rough colony *M. abscessus* (R), often associated with a  
39 decline in pulmonary function. Currently available animal models such as the embryonic zebrafish,  
40 have largely explored the role of innate immunity in the pathogenesis of *M. abscessus*, and  
41 demonstrated that infection with the R variant produces a hyperinflammatory infection due to the  
42 presence of large extracellular cords, whereas the S variant produces a chronic persistent infection.  
43 However, our understanding of the role of adaptive immunity in *M. abscessus* pathogenesis is  
44 largely unknown. Here, we have used intraperitoneal infection of adult zebrafish to model *M.*  
45 *abscessus* pathogenesis in the context of fully functioning host immunity. We find infection with  
46 the R variant penetrates host organs causing an inflammatory immune response leading to necrotic  
47 granuloma and abscess formation within 2 weeks. The R bacilli are targeted by T cell-mediated  
48 immunity and burden is progressively reduced. Strikingly, the S variant colonises host internal  
49 surfaces at high loads and is met with a robust innate immune response. Invasive granuloma  
50 formation is delayed in S variant infection compared to R variant infection. In mixed infections, the  
51 S variant outcompetes the R variant in an adaptive-immunity dependent manner. We also find the R  
52 variant activates innate immunity to detriment of S variant *M. abscessus* in mixed infections. These  
53 findings demonstrate the applicability of the adult zebrafish to model persistent *M. abscessus*  
54 infection.

55

## 56 **Introduction**

57 *Mycobacterium abscessus* is an increasingly recognized human pathogen responsible for a wide  
58 array of clinical manifestations including muco-cutaneous infections, disseminated or chronic  
59 pulmonary diseases. The latter is mostly encountered in patients with underlying lung disorders,  
60 such as bronchiectasis or cystic fibrosis (CF). Irrespective of being a rapid-growing mycobacteria  
61 (RGM), *M. abscessus* displays many pathophysiological traits with slow-growing mycobacteria  
62 (SGM), such as *Mycobacterium tuberculosis*. These include the capacity to persist silently within  
63 granulomatous structures and to produce pulmonary caseous lesions (1, 2). In addition, *M.*  
64 *abscessus* is notorious for being one of the most-drug resistant mycobacterial species, characterized  
65 by a wide panel of acquired and innate drug resistance mechanisms against nearly all anti-tubercular  
66 drugs, as well as many classes of antibiotics (3). Consequently, this explains the complexity and  
67 duration of the treatments and the high level of therapeutic failure (4).

68 *M. abscessus* exists either as a smooth (S) or a rough (R) colony morphotype associated with  
69 distinct clinical outcomes (5). Previous epidemiological studies have highlighted the association of

70 the R variant, persisting for many years in the infected host, with a rapid decline in the pulmonary  
71 functions (6-8). It is well established that these morphological differences between S and R variants  
72 are dependent on the presence or absence of surface-exposed glycopeptidolipids (GPL),  
73 respectively (5, 9, 10). However, our knowledge of the pathophysiological characteristics and  
74 interactions between R or S variants with the host immune cells remains largely incomplete and is  
75 hampered by the lack of animal models that are permissive to persistent *M. abscessus* infection.

76 Intravenous injection or aerosol administration of *M. abscessus* in immunocompetent BALB/c  
77 mice fails to establish a persistent infection, typified by a rapid clearance of the bacilli from the  
78 liver, spleen and lungs within 4 weeks (11). Immunosuppression is required to produce a  
79 progressive high level of infection with *M. abscessus* in mice, as shown in nude, SCID (severe  
80 combined immunodeficiency), interferon-gamma (GKO) and granulocyte-macrophage colony-  
81 stimulating factor (GM-CSF) knock-out mice (12).

82 The contribution of B and T cells in the control of *M. abscessus* infection has been studied in  
83 C57BL/6 mice with Rag2<sup>-/-</sup>, Cd3e<sup>-/-</sup> and μMT<sup>-/-</sup> knockouts. These studies indicated that infection  
84 control was primarily T cell dependent in the spleen, and both B and T cell dependent in the liver  
85 (13). In addition, IFNγ-receptor KO mice (ifngr1<sup>-/-</sup>) were significantly impaired in their control of  
86 *M. abscessus* both in the spleen and in the liver, with markedly different granulomas and more  
87 pronounced in TNF<sup>-/-</sup> mice (13). This points to the central role of T-cell immunity, IFNγ and TNF  
88 for the control of *M. abscessus* in C57BL/6 mice, similarly to the control of *M. tuberculosis*  
89 infection.

90 In recent years, alternative non-mammalian models, such as *Drosophila* (14), *Galleria* larvae  
91 (15), and zebrafish embryos (16) have been developed to study the chronology and pathology of *M.*  
92 *abscessus* infection and for *in vivo* therapeutic assessment of drugs active against *M. abscessus*. In  
93 particular, zebrafish embryos have delivered important insights into the pathogenesis of *M.*  
94 *abscessus* and the participation of innate immunity in controlling infection. The optical  
95 transparency of zebrafish embryos has been used to visualise the formation of large extracellular  
96 cords by the R form *in vivo*, representing a mechanism of immune subversion by preventing  
97 phagocytic destruction and highlighting the importance bacterial virulence factors such as the  
98 dehydratase MAB\_4780 and the MmpL8<sub>MAB</sub> lipid transporter (9, 17, 18). Other studies in zebrafish  
99 embryos have demonstrated the contribution of host TNF signalling and IL8-mediated neutrophil  
100 recruitment for protective granulomatous immunity against *M. abscessus* (19), and the link  
101 between dysfunctional CFTR and vulnerability to *M. abscessus* infection via the macrophage  
102 oxidative response (20).

103 Adult zebrafish models have been well-described for the study of mycobacterial pathogenesis  
104 by *Mycobacterium marinum*, used as a surrogate for the closely related *M. tuberculosis*, and the

105 human pathogen *Mycobacterium leprae* (21-23). Encompassing a fully functional immune system,  
106 previous studies in adult zebrafish with pathogenic mycobacteria such as *M. marinum* have  
107 unravelled the interplay between innate and adaptive immunity in mycobacterial granuloma  
108 formation and function.

109 Herein, we addressed whether adult zebrafish may be a useful host to analyse and compare  
110 the chronology of infection with *M. abscessus* S and R variants and to study the contribution of the  
111 T cell-mediated immunity and granulomatous response in *M. abscessus* infection.

112

## 113 **Results**

### 114 Adult zebrafish can be chronically infected with *M. abscessus*.

115 To establish the susceptibility of adult zebrafish to infection by *M. abscessus*, we performed a dose  
116 escalation experiment up to  $10^6$  CFU per animal with the rough (R) and smooth (S) variants of the  
117 reference strain CIP104536<sup>T</sup>. While animals underwent a period of sickness behaviour within the  
118 first week of infection, we did not observe mortality for up to 4 weeks post infection (wpi) (data not  
119 shown). To determine if *M. abscessus* produces a persistent infection in adult zebrafish, we  
120 performed CFU recovery on animals infected with a standard dose of  $10^5$  CFU (Figure 1A). We  
121 observed a progressive clearance of the R variant with a 1-log reduction in burden from 1 day post  
122 infection (dpi) to 4 wpi (P=0.018). Conversely, the S variant was recovered at a consistent burden  
123 across the 4 week duration of the experiment (1 dpi vs 4 wpi, P=0.12). We hypothesised that the  
124 better survival of the S variant compared to the R variant could be attributed to reduced  
125 immunogenicity of the CIP104536 S cell surface and different modes of growth in macrophages  
126 (24). To test this hypothesis, we performed qPCR detection of zebrafish immune gene expression  
127 from infected adult homogenates (25). We observed higher innate immunity-associated *illb*  
128 transcription in the *M. abscessus* S-infected group from early in infection and a late trend to  
129 increases in *illb* transcription in 4 wpi *M. abscessus* R-infected animals (Figure 1B). Expression of  
130 *cd3*, indicative of total T cell numbers, was significantly decreased in all *M. abscessus*-infected  
131 animals at 2 wpi but returned to uninfected levels by 4 wpi with higher *cd3* expression in *M.*  
132 *abscessus* R-infected compared to *M. abscessus* S-infected animals (Figure 1C). There was a trend  
133 towards increased transcription of the Th1 activation marker *ifng* in R compared to S or uninfected  
134 fish at 4 wpi (Figure 1D).

135

### 136 Adult zebrafish contain *M. abscessus* R within granulomas.

137 We next performed histology on adult zebrafish infected with fluorescent *M. abscessus* R. At 3 dpi,  
138 bacteria were diffusely spread through the peritoneal cavity with occasional foci of infection located  
139 external to peritoneal organs. From 10 dpi to 2 wpi we noted a heterogeneous mix of unorganised

140 lesions (Figure 2A) and organised lesions with stereotypical concentric rings of nuclei around a  
141 central focus of bacteria and necrotic debris in all animals (Figure 2B). We also observed the  
142 appearance of very large abscess-like granulomas filled with fluorescent bacteria and necrotic  
143 debris measuring over 600  $\mu\text{m}$  at a rate of no more than 1 per infected animal from 2 wpi onwards  
144 (Figure 2C). Oil red O staining revealed the accumulation of foam cells in cellular rim of *M.*  
145 *abscessus* R granulomas (Figure 2D), consistent with immunopathology seen in  
146 immunocompromised mice infected with *M. abscessus* (12). Although we observed a fairly stable  
147 proportion of organised granulomas in *M. abscessus* R-infected adult zebrafish from 10 to 28 dpi  
148 (Figure 2E), the proportion of fluorescent bacteria associated with organised granulomas  
149 significantly increased from 10 to 28 dpi corresponding to the appearance of abscesses at 14 dpi  
150 (Figure 2F).

151

#### 152 Adult zebrafish contain *M. abscessus* S infection prior to delayed granuloma formation.

153 Histological analysis of adult zebrafish infected with fluorescent *M. abscessus* S revealed  
154 significantly less tissue damage than the equivalent *M. abscessus* R infection up to 2 wpi. *M.*  
155 *abscessus* S was observed to grow freely in mesenteric spaces and form poorly organised cellular  
156 granulomas at 2 wpi (Figure 3A). We observed the appearance of tissue-invasive organised  
157 granulomas at 4 wpi (Figure 3B). Although these granulomas could reach similar size to the very  
158 large abscess-like granulomas seen in *M. abscessus* R infection, there was little Oil Red O staining  
159 in *M. abscessus* S granulomas indicating a lack of foam cell formation (Figure 3C).

160 We observed a significant increase in the proportion of organised granulomas in S-infected  
161 adult zebrafish from 2 to 4 wpi (Figure 3D). Similarly, the proportion of fluorescent bacteria  
162 associated with organised granulomas significantly also increased from 2 to 4 wpi corresponding to  
163 the consolidation of *M. abscessus* S into granulomas (Figure 3E).

164 The cytokine *tumour necrosis factor* (*tnf*) is essential for the containment of *M. abscessus* in  
165 zebrafish embryos (19). We next took advantage of the progressive pathology observed in 4 wpi *M.*  
166 *abscessus* S-infected *TgBAC(tnfa:GFP)<sup>pd1028</sup>* animals, where GFP expression is driven by the *tnfa*  
167 promoter, to investigate if *tnf* expression is linked to granuloma formation. Expression of GFP was  
168 concentrated to tightly organised necrotic granulomas demonstrating a conserved induction of *tnf*  
169 expression during *M. abscessus* granuloma formation in adult zebrafish (Figure 3F).

170

#### 171 Adaptive immunity is necessary for control of *M. abscessus* infection in adult zebrafish.

172 Given the requirement for T cells to maintain granuloma structure in adult zebrafish *M. marinum*  
173 infection (23), we next asked if there was T cell involvement around *M. abscessus* granulomas  
174 using the recently described *TgBAC(lck:GFP)<sup>vcc4</sup>* zebrafish line (23, 26). We observed T cell

175 association and penetration throughout unorganised and organised *M. abscessus* R granulomas, but  
176 T cells were largely excluded from the cores of the very large abscess-like lesions (Figure 4A).  
177 Conversely, we did not observe T cell interaction with *M. abscessus* S growing around peritoneal  
178 organs until invasive granuloma formation after 2 wpi, which was indistinguishable from the T cell  
179 response to *M. abscessus* R infection (Figure 4B). To directly test the requirement of T cells in  
180 containing *M. abscessus* we next utilised the *lck<sup>-/-sa410</sup>* mutant line which is T cell-deficient. We  
181 infected wild type (WT) control and *lck<sup>-/-sa410</sup>* mutant adult zebrafish with both the S and R variants.  
182 T cell-deficient adult zebrafish were significantly more susceptible to *M. abscessus* R infection with  
183 reduced survival over 4 weeks of infection (P = 0.0005, Log-rank test) (Figure 4C). T cell  
184 deficiency had a less pronounced effect on the survival of animals infected with *M. abscessus* S  
185 compared to *M. abscessus* R infection (WT S vs *lck<sup>-/-</sup>* S P = 0.03, Log-rank test), although both  
186 groups eventually succumbed to infection at the same rate after 5 wpi (P = 0.78, Log-rank test)  
187 (Figure 4C). Consequently, bacterial burden was significantly increased in 2 wpi *lck<sup>-/-sa410</sup>* mutants  
188 infected with the R (Figure 4D), but not the S variant (Figure 4E). These observations confirm the  
189 highly inflammatory nature of *M. abscessus* R infection is conserved in the adult zebrafish model  
190 and mediated by T-cells. Conversely, colonisation by *M. abscessus* S is contained by sufficient  
191 activation of the innate immune response until invasive infection between 2 and 4 wpi.

192

### 193 *M. abscessus* S has a survival advantage over *M. abscessus* R.

194 To examine our hypothesis that *M. abscessus* S has a survival advantage over *M. abscessus* R in the  
195 adult zebrafish infection model, we performed co-infection of adult zebrafish with equal numbers of  
196 each variant expressing either Wasabi or Tdtomato fluorescent proteins to enable simple tracking  
197 (Figure 5A). Analysis of the ratio of R:S colonies recovered revealed a clear and rapid shift in  
198 population proportions from 1:1 at 1 dpi to 0.5 rough:1 smooth ratio that remained stable at 2 wpi  
199 (Figure 5B). Coinfection did not affect the progressive reduction in *M. abscessus* R burden as near  
200 identical *M. abscessus* R CFUs were recovered from single and mixed-infected animals at 1 and 2  
201 wpi (Figure 5C). Coinfection did cause a decrease in the number of recoverable *M. abscessus* S that  
202 was not observed in single variant infections at 1 and 2 wpi demonstrating a negative effect of R  
203 granuloma formation on the survival of *M. abscessus* S (Figure 5C). Whole mount and histological  
204 examination of bacterial distribution in animals infected with *M. abscessus* R expressing Wasabi  
205 and *M. abscessus* S expressing Tdtomato revealed co-mingling of S and R variants within  
206 granulomas (Figure 5D).

207 We hypothesised that the T cell response induced by the R variant to antigens shared with  
208 the S strain could be responsible for the clearance of S strain in mixed infections. To test this  
209 hypothesis we infected T-cell deficient *lck<sup>-/-sa410</sup>* mutant animals with a mixed infection of R and S

210 variants of *M. abscessus*. CFU recovery from these mixed infections in the T-cell deficient animals  
211 revealed a similar decrease in *M. abscessus* S burden as observed in WT animals (Figure 5E).  
212 Therefore the clearance of *M. abscessus* S strain is mediated by innate immune mechanisms.  
213 Interestingly, *lck*<sup>-/-sa410</sup> zebrafish had a higher proportion of rough to smooth than in comparable WT  
214 animals, confirming the importance of the adaptive immune response for controlling *M. abscessus*  
215 R strain burden (Figure 5F).

216

## 217 Discussion

218 In this study, we report for the use of adult zebrafish to probe both host and mycobacterial  
219 determinants of pathogenesis during persistent infection with *M. abscessus*. Infection with the R  
220 and S variants was maintained over months of infection in genetically intact animals, a major  
221 improvement on existing mouse models of *M. abscessus* infection.

222 While the R variant induces a more robust and aggressive infection than the S morphotype in  
223 zebrafish embryos (9), this appears to not be the case in the adult fish. We observed better clearance of  
224 the R variant and establishment of a higher burden of persistent infection with the S variant. One  
225 possible explanation for the better survival of the S compared to the R is that, in the presence of  
226 effective adaptive immunity, R infection is better controlled due to the induction of a potent Th1  
227 cell-mediated response, as evidenced by the increased expression of the CD3 marker and IFN-  
228 gamma response at later time points. This contribution of the T cell response was further  
229 substantiated using T cell-deficient fish, where infection of *lck*<sup>-/-</sup> fish with the R bacilli resulted in a  
230 higher bacterial burden than in WT fish, which was not observed with S bacilli. These observations  
231 provide insight into the clinical observation that AIDS patients are not at increased risk of *M.*  
232 *abscessus* infection to the same degree that AIDS is a risk factor for *M. tuberculosis* and other non-  
233 tuberculous mycobacterium infections such as *Mycobacterium avium*.

234 It is well known that the intracellular lifestyle of S and R *M. abscessus* variants differ  
235 significantly, resulting in entirely distinct infection scenarios (27). The absence of GPL on the outer  
236 mycomembrane causes corded growth of R variants, resulting in multiple bacilli being  
237 simultaneously phagocytosed by macrophages and overloaded phagosomes that rapidly activate  
238 autophagy pathways (27). Comparatively, the S variant is able to survive for an extended period of  
239 time within the phagosome, producing a chronic and persistent infection (28, 29). As such, these  
240 polar infection responses may explain why the R displays increased granuloma formation at 2 wpi,  
241 compared to S which shows a significantly delayed onset of granuloma formation. Moreover, this  
242 observation matches the superior *in vivo* growth performance of S bacilli compared to R (Fig 1A),  
243 suggesting that the R variant is at an overall disadvantage because of its intrinsic hyper-  
244 inflammatory status and the activation of effective adaptive immunity that results in granuloma

245 formation. Taken together, our data provides additional evidence for the distinct intracellular fates  
246 of both S and R variants *in vivo*, and further implicates the role of adaptive immunity in granuloma  
247 formation and control of *M. abscessus* infection in an adult zebrafish model.

248 Our qPCR analysis surprisingly demonstrated that the S variant elicits greater production of  
249 *il1b*; a key inflammatory cytokine, during the first 2 wpi compared to the R variant (Fig 1B). It is  
250 likely that this observation is the net effect of progressive increase in bacterial burden of S variants  
251 over time, coupled with the presence of extracellular bacilli and unorganised granuloma formation  
252 observed at 2 wpi, compared to the containment and clearance of the R variant in organised  
253 granulomas.

254 T cells are critical host determinants in the control of mycobacterial infection (30).  
255 Recruitment of T cells into granulomas are thought to be essential in containing persistent infection,  
256 while T cell deficiencies are associated with greater mycobacterial infection severities (21, 30-32).  
257 Recently, an adult zebrafish infection model for *M. leprae* demonstrated that T cells are essential  
258 for containment of infection (29). We examined the recruitment of T cells within granulomas and  
259 identified that S variant granulomas were marked by the absence of T cell infiltration at 2 wpi,  
260 highlighting the fact that T cells may play a less significant role in S variant infections than those  
261 with R variants. Using the *lck*<sup>-/-</sup> mutants, we have shown that adult zebrafish are highly susceptible  
262 to *M. abscessus* infection and succumb to intraperitoneal infection within 40 days in the absence of  
263 T cells, irrespective of bacterial morphotype. Importantly, the R variant displayed an improved *in*  
264 *vivo* growth performance in the absence of T cells when compared to wild-type zebrafish,  
265 highlighting the role of T cells in the control of R variants. However, this observation was not  
266 maintained with the S variant, which showed no increase in bacterial growth *in vivo* irrespective of  
267 the absence of T cells early in infection.

268 Our co-infection experiments further support the theory that tissue destruction caused by R  
269 variant activates protective trans-acting host innate immunity that impairs bacterial growth, thereby  
270 restricting S growth (Graphical Abstract). This suggests *M. abscessus* must balance the benefits of  
271 R variant pathogenicity allowing individuals to kill and escape macrophage containment, with the  
272 need to avoid activation of host-protective immunity at a population level.

273 To date, our understanding of the diverse immune responses between S and R variants have  
274 only been thoroughly described with respect to innate immunity, and currently our knowledge  
275 pertaining to adaptive immunity in *M. abscessus* infection has been poorly characterised. Using this  
276 new adult zebrafish *M. abscessus* infection model, we have shown that S and R variants produce  
277 strikingly different disease phenotypes, which was further exemplified in the absence of a  
278 functioning adaptive immune response. Consequently, these results suggest that the host-pathogen  
279 interactions dictating *M. abscessus* pathogenesis are complex and may implicate adaptive immunity



280 to a greater extent than originally anticipated. Future work should exploit this new animal model in  
281 combination with zebrafish lacking the Cystic fibrosis transmembrane conductance regulator gene,  
282 and for the development and testing of novel antibiotics and vaccine candidates that may be used  
283 for the treatment of *M. abscessus* infection.

284

## 285 **Methods**

### 286 Zebrafish strains and handling

287 Zebrafish strains used in this study are AB strain wildtype, *TgBAC(tnfa:GFP)<sup>pd1028</sup>*,  
288 *TgBAC(lck:EGFP)<sup>vcc4</sup>*, *lck/-<sup>sa410</sup>* (26, 33). Animals were held in a 28°C incubator with a 14:10 hour  
289 light:dark cycle. Animals were infected by intraperitoneal injection with approximately 10<sup>5</sup> CFU *M.*  
290 *abscessus*, unless otherwise stated, using a 31 G insulin needle and syringe as previously described  
291 (34). Infected zebrafish were recovered into system water and held in 1 L beakers with daily  
292 feeding for the duration of the experiment. Infection experiments were carried out with ethical  
293 approval from the Sydney Local Health District Animal Welfare Committee approval 16-037.

294

### 295 *M. abscessus* strains and handling

296 Rough (R) and smooth (S) variants of *M. abscessus* strain CIP104536<sup>T</sup> were grown at 30°C in  
297 Middlebrook 7H9 broth supplemented with 10% Oleic acid/Albumin/Dextrose/Catalase (OADC)  
298 enrichment and 0.05% Tween 80 or on Middlebrook 7H10 agar containing 10% OADC (7H10  
299 OADC). Recombinant *M. abscessus* strains expressing Tdtomato or Wasabi were grown in the  
300 presence of 500 µg/ml hygromycin (9, 19). Homogenous bacterial suspensions for intraperitoneal  
301 injection in adult fish were prepared as previously reported (35).

302

### 303 Bacterial recovery

304 Animals were euthanised by tricaine anaesthetic overdose and rinsed in sterile water. Individual  
305 carcasses were homogenised and serially diluted into sterile water. Homogenates were plated onto  
306 7H10 OADC supplemented with 300 µg/ml hygromycin. Plates were grown for at least 4 days at 37  
307 degrees.

308

### 309 Zebrafish and *M. abscessus* gene expression analysis by qPCR

310 RNA was extracted from whole fish homogenates and was reverse transcribed with the Applied  
311 Biosystems High Capacity cDNA kit and qPCR was carried out on an Agilent Technologies  
312 Stratagene Mx3005P. Zebrafish gene expression primers were previously described by Hammaren  
313 *et al.* (25).

314

315 **Histology**

316 Animals subjected to cryosectioning as previously described (34). Briefly, euthanasia was  
317 performed by tricaine anaesthetic overdose and specimens were fixed for 2-4 days in 10% neutral  
318 buffered formalin at 4°. Specimens were then rinsed in PBS, incubated overnight in 30% sucrose,  
319 incubated overnight in 50/50 30% sucrose and OCT, and finally incubated overnight in OCT prior  
320 to freezing at -80°. Cryosectioning was performed to produce 20 µm thick sections. Sections were  
321 post-fixed for 1-2 minutes in 10% neutral buffered formalin and rinsed in PBS prior to further  
322 processing. Slides for fluorescent imaging were mounted with coverslips using Fluoromount G  
323 containing DAPI. Oil Red O staining was performed as previously described (34, 36). T cells were  
324 detected in sections from *TgBAC(lck:GFP)<sup>vcc4</sup>* zebrafish by anti-GFP staining (primary antibody:  
325 ab13970, Abcam; secondary antibody: ab150173, Abcam), stained slides were then mounted with  
326 coverslips using Fluoromount G containing DAPI. All imaging was carried out on a Leica  
327 DM6000B microscope.

328

329 **Statistics**

330 All statistical testing was carried out using Graphpad Prism. Each data point indicates a single  
331 animal unless otherwise stated.

332

333 **Acknowledgements**

334 We thank the Centenary imaging facility core and Sydney Cytometry staff Drs Kristina Jahn,  
335 Angela Kurz, and David Liu, for their assistance.

336 Funding: Australian National Health and Medical Research Council CJ Martin Early Career  
337 Fellowship APP1053407 and Project Grant APP1099912; The University of Sydney Fellowship  
338 G197581; NSW Ministry of Health under the NSW Health Early-Mid Career Fellowships Scheme  
339 H18/31086; the Kenyon Family Foundation Inflammation Award; Australian-French Association  
340 for Research and Innovation (AFRAN) Initiative to SHO. The Fondation pour la Recherche  
341 Médicale DEQ20150331719 to LK. Post-doctoral fellowship granted by Labex EpiGenMed, an  
342 “Investissements d’avenir” program ANR-10-LABX-12-01 to MDJ.

343

344 **References**

- 345 1. H. Medjahed, J. L. Gaillard, J. M. Reyrat, Mycobacterium abscessus: a new player in the  
346 mycobacterial field. *Trends Microbiol* **18**, 117-123 (2010).
- 347 2. J. F. Tomaszefski, Jr., R. C. Stern, C. A. Demko, C. F. Doershuk, Nontuberculous  
348 mycobacteria in cystic fibrosis. An autopsy study. *Am J Respir Crit Care Med* **154**, 523-528  
349 (1996).

- 350 3. R. Nessar, E. Cambau, J. M. Reyrat, A. Murray, B. Gicquel, Mycobacterium abscessus: a new  
351 antibiotic nightmare. *The Journal of antimicrobial chemotherapy* **67**, 810-818 (2012).
- 352 4. B. E. Ferro *et al.*, Failure of the Amikacin, Cefoxitin, and Clarithromycin Combination  
353 Regimen for Treating Pulmonary Mycobacterium abscessus Infection. *Antimicrob Agents*  
354 *Chemother* **60**, 6374-6376 (2016).
- 355 5. S. T. Howard *et al.*, Spontaneous reversion of Mycobacterium abscessus from a smooth to a  
356 rough morphotype is associated with reduced expression of glycopeptidolipid and  
357 reacquisition of an invasive phenotype. *Microbiology* **152**, 1581-1590 (2006).
- 358 6. E. Catherinot *et al.*, Acute respiratory failure involving an R variant of Mycobacterium  
359 abscessus. *J Clin Microbiol* **47**, 271-274 (2009).
- 360 7. C. R. Esther, Jr., D. A. Esserman, P. Gilligan, A. Kerr, P. G. Noone, Chronic Mycobacterium  
361 abscessus infection and lung function decline in cystic fibrosis. *J Cyst Fibros* **9**, 117-123  
362 (2010).
- 363 8. B. E. Jonsson *et al.*, Molecular epidemiology of Mycobacterium abscessus, with focus on  
364 cystic fibrosis. *J Clin Microbiol* **45**, 1497-1504 (2007).
- 365 9. A. Bernut *et al.*, Mycobacterium abscessus cording prevents phagocytosis and promotes  
366 abscess formation. *Proc Natl Acad Sci U S A* **111**, E943-952 (2014).
- 367 10. H. Medjahed, J. M. Reyrat, Construction of Mycobacterium abscessus defined  
368 glycopeptidolipid mutants: comparison of genetic tools. *Appl Environ Microbiol* **75**, 1331-  
369 1338 (2009).
- 370 11. A. Bernut *et al.*, In vivo assessment of drug efficacy against Mycobacterium abscessus using  
371 the embryonic zebrafish test system. *Antimicrob Agents Chemother* **58**, 4054-4063 (2014).
- 372 12. A. Obregon-Henao *et al.*, Susceptibility of Mycobacterium abscessus to antimycobacterial  
373 drugs in preclinical models. *Antimicrob Agents Chemother* **59**, 6904-6912 (2015).
- 374 13. M. Rottman *et al.*, Importance of T cells, gamma interferon, and tumor necrosis factor in  
375 immune control of the rapid grower Mycobacterium abscessus in C57BL/6 mice. *Infect*  
376 *Immun* **75**, 5898-5907 (2007).
- 377 14. C. T. Oh, C. Moon, M. S. Jeong, S. H. Kwon, J. Jang, *Drosophila melanogaster* model for  
378 Mycobacterium abscessus infection. *Microbes Infect* **15**, 788-795 (2013).
- 379 15. M. Meir, T. Grosfeld, D. Barkan, Establishment and Validation of *Galleria mellonella* as a  
380 Novel Model Organism To Study Mycobacterium abscessus Infection, Pathogenesis, and  
381 Treatment. *Antimicrob Agents Chemother* **62** (2018).
- 382 16. A. Bernut, J. L. Herrmann, D. Ordway, L. Kremer, The Diverse Cellular and Animal Models  
383 to Decipher the Physiopathological Traits of Mycobacterium abscessus Infection. *Front Cell*  
384 *Infect Microbiol* **7**, 100 (2017).

- 385 17. V. Dubois *et al.*, MmpL8MAB controls Mycobacterium abscessus virulence and production  
386 of a previously unknown glycolipid family. *Proc Natl Acad Sci U S A* **115**, E10147-E10156  
387 (2018).
- 388 18. I. Halloum *et al.*, Deletion of a dehydratase important for intracellular growth and cording  
389 renders rough Mycobacterium abscessus avirulent. *Proc Natl Acad Sci U S A* **113**, E4228-  
390 4237 (2016).
- 391 19. A. Bernut *et al.*, Mycobacterium abscessus-Induced Granuloma Formation Is Strictly  
392 Dependent on TNF Signaling and Neutrophil Trafficking. *PLoS Pathog* **12**, e1005986 (2016).
- 393 20. A. Bernut *et al.*, CFTR Protects against Mycobacterium abscessus Infection by Fine-Tuning  
394 Host Oxidative Defenses. *Cell reports* **26**, 1828-1840 e1824 (2019).
- 395 21. C. A. Madigan, J. Cameron, L. Ramakrishnan, A Zebrafish Model of Mycobacterium leprae  
396 Granulomatous Infection. *J Infect Dis* **216**, 776-779 (2017).
- 397 22. S. H. Oehlers *et al.*, Interception of host angiogenic signalling limits mycobacterial growth.  
398 *Nature* **517**, 612-615 (2015).
- 399 23. L. E. Swaim *et al.*, Mycobacterium marinum infection of adult zebrafish causes caseating  
400 granulomatous tuberculosis and is moderated by adaptive immunity. *Infect Immun* **74**, 6108-  
401 6117 (2006).
- 402 24. A. L. Roux *et al.*, The distinct fate of smooth and rough Mycobacterium abscessus variants  
403 inside macrophages. *Open Biol* **6** (2016).
- 404 25. M. M. Hammaren *et al.*, Adequate th2-type response associates with restricted bacterial  
405 growth in latent mycobacterial infection of zebrafish. *PLoS Pathog* **10**, e1004190 (2014).
- 406 26. K. Sugimoto, S. P. Hui, D. Z. Sheng, M. Nakayama, K. Kikuchi, Zebrafish FOXP3 is required  
407 for the maintenance of immune tolerance. *Dev Comp Immunol* **73**, 156-162 (2017).
- 408 27. A.-L. Roux *et al.*, The distinct fate of smooth and rough Mycobacterium abscessus variants  
409 inside macrophages. *Open biology* **6** (2016).
- 410 28. A. Bernut *et al.*, *Mycobacterium abscessus* cording prevents phagocytosis and promotes  
411 abscess formation. *Proceedings of the National Academy of Sciences* **111**, 943-952 (2014).
- 412 29. L. Ramakrishnan, Revisiting the role of the granuloma in tuberculosis. *Nature Reviews*  
413 *Immunology* **12**, 352-366 (2012).
- 414 30. F. M. Collins, Mycobacterial disease, immunosuppression, and acquired immunodeficiency  
415 syndrome. *Clin Microbiol Rev* **2**, 360-377 (1989).
- 416 31. T. Mogue, M. E. Goodrich, L. Ryan, R. LaCourse, R. J. North, The relative importance of T  
417 cell subsets in immunity and immunopathology of airborne Mycobacterium tuberculosis  
418 infection in mice. *J Exp Med* **193**, 271-280 (2001).

- 419 32. J. D. Yang *et al.*, Mycobacterium tuberculosis-specific CD4+ and CD8+ T cells differ in their  
420 capacity to recognize infected macrophages. *PLoS Pathog* **14**, e1007060 (2018).
- 421 33. L. Marjoram *et al.*, Epigenetic control of intestinal barrier function and inflammation in  
422 zebrafish. *Proc Natl Acad Sci U S A* **112**, 2770-2775 (2015).
- 423 34. T. Cheng, J. Y. Kam, M. D. Johansen, S. H. Oehlers, High content analysis of granuloma  
424 histology and neutrophilic inflammation in adult zebrafish infected with Mycobacterium  
425 marinum. *Micron* 10.1016/j.micron.2019.102782 (2019).
- 426 35. A. Bernut *et al.*, Deciphering and Imaging Pathogenesis and Cording of Mycobacterium  
427 abscessus in Zebrafish Embryos. *J Vis Exp* 10.3791/53130 (2015).
- 428 36. M. D. Johansen *et al.*, Mycobacterium marinum infection drives foam cell differentiation in  
429 zebrafish infection models. *Dev Comp Immunol* **88**, 169-172 (2018).

430

### 431 **Figure Legends**

432

433 Figure 1: *M. abscessus* establishes chronic infection in adult zebrafish.

434 A. Enumeration of CFUs from adult zebrafish infected with either the R or the S morphotype of *M.*  
435 *abscessus*.

436 B. Gene expression analysis of zebrafish *interleukin 1b*.

437 C. Gene expression analysis of zebrafish *cd3*.

438 D. Gene expression analysis of zebrafish *interferon gamma*.

439 Statistical tests by one-way ANOVA with Tukey's multiple comparisons test. Data is pooled from  
440 10 animals across 2 independent experiments.

441

442 Figure 2: *M. abscessus* R infection causes progressive granulomatous pathology.

443 A. Stereotypical unorganised granuloma in a 2 wpi adult zebrafish infected with the R variant of *M.*  
444 *abscessus* expressing Tdtomato. Scale bar indicates 100  $\mu$ m.

445 B. i. Stereotypical organised granuloma in a 2 wpi adult zebrafish infected with R *M. abscessus*-  
446 Tdtomato and ii. Higher magnification image of granuloma wall. Arrowheads indicate epithelised  
447 macrophage nuclei surrounding the mycobacterial core. Scale bar indicates 100  $\mu$ m.

448 C. Example of a very large abscess-like granuloma in a 2 wpi adult zebrafish infected with R *M.*  
449 *abscessus*-Tdtomato measuring approximately 600  $\mu$ m in diameter. Scale bar indicates 200  $\mu$ m.

450 D. Example of Oil Red O-stained very large abscess-like granuloma in a 2 wpi adult zebrafish  
451 infected with R *M. abscessus*. Arrowheads indicate Oil Red O-positive foamy macrophages  
452 surrounding the mycobacterial core. Scale bar indicates 200  $\mu$ m.

453 E. Quantification of granuloma organisation in adult zebrafish infected with R *M. abscessus*. Data is  
454 pooled from 2 animals per timepoint.

455 F. Quantification of bacterial burden stratified by granuloma organisation in adult zebrafish infected  
456 with R *M. abscessus*. Data is pooled from 2 animals per timepoint, statistical testing by Chi-squared  
457 test.

458

459 Figure 3: *M. abscessus* S infection causes delayed progressive granulomatous pathology.

460 A. Examples S *M. abscessus*-Tdtomato lesions from 2 wpi adult zebrafish. i. *M. abscessus* growing  
461 free, external to peritoneal organs. ii and iii. Stereotypical examples of unorganised cellular  
462 granulomas around sites of sparse *M. abscessus* infection.

463 B. Stereotypical large granuloma found in 4 wpi adult zebrafish infected with S *M. abscessus*-  
464 Tdtomato. Note lack of punctate bacterial fluorescence in the core of the granuloma compared to  
465 second granuloma to the right.

466 C. Example of Oil Red O-stained large granuloma in 4 wpi adult zebrafish infected with S *M.*  
467 *abscessus*. Note lack of lipid staining in the rim of the granuloma compared to R infection.

468 D. Quantification of granuloma organisation in adult zebrafish infected with S *M. abscessus*. Data is  
469 pooled from at least 2 animals per timepoint, statistical testing by Chi-squared test.

470 E. Quantification of bacterial burden stratified by granuloma organisation in adult zebrafish infected  
471 with S *M. abscessus*. Data is pooled from at least 2 animals per timepoint, statistical testing by Chi-  
472 squared test.

473 F. Example of S *M. abscessus*-Tdtomato lesions in 4 wpi *TgBAC(tnfa:GFP)<sup>pd1028</sup>* adult zebrafish.  
474 Arrowheads indicate organised necrotic granulomas with strong *tnfa* expression marked by GFP.  
475 Scale bars indicate 200  $\mu$ m.

476

477 Figure 4: T cells are necessary to control R but not S *M. abscessus* infection.

478 A. Examples of T cell recruitment to granulomas in 2 wpi *TgBAC(lck:EGFP)<sup>vcc4</sup>* adult zebrafish  
479 infected with R *M. abscessus*-Tdtomato . i. Example of an unorganised granuloma. ii. Example of  
480 an organised granuloma. iii. Example of a very large abscess-like granuloma. Scale bars indicate  
481 100  $\mu$ m.

482 B. Example of lack of T cell recruitment to S *M. abscessus*-Tdtomato in 2 wpi  
483 *TgBAC(lck:EGFP)<sup>vcc4</sup>* adult zebrafish. Scale bar indicates 100  $\mu$ m.

484 C. Survival analysis of WT and *lck*<sup>-/-</sup> *sa410* adult zebrafish infected with R or S *M. abscessus*.

485 D. Enumeration of CFUs from 2 wpi WT and *lck*<sup>-/-</sup> *sa410* adult zebrafish infected with R *M.*  
486 *abscessus*. Statistical testing by T-test.

487 E. Enumeration of CFUs from 2 wpi WT and  $lck^{-/-}^{sa410}$  adult zebrafish infected with S *M.*  
488 *abscessus*. Statistical testing by T-test.  
489  
490 Figure 5: S *M. abscessus* has a survival advantage over R *M. abscessus*.  
491 A. Schema outlining mixed infection experiment.  
492 B. Ratio of R:S CFUs recovered from WT adult zebrafish infected with a mixture of differentially  
493 labelled R and S variant *M. abscessus*.  
494 C. Enumeration of CFUs from the three groups of WT adult zebrafish outlined in panel A. Data is  
495 pooled from two replicates, statistical testing by ANOVA.  
496 D. Representative images of granuloma from adult zebrafish infected with a mixture of R  
497 expressing Wasabi and S expressing Tdtomato *M. abscessus*.  
498 E. Enumeration of CFUs from the three groups of  $lck^{-/-}^{sa410}$  adult zebrafish outlined in panel A.  
499 Data is pooled from two replicates, statistical testing by ANOVA.  
500 F. Ratio of R:S CFUs recovered from  $lck^{-/-}^{sa410}$  adult zebrafish infected with a mixture of  
501 differentially labelled R and S variants.  
502

Figure 1

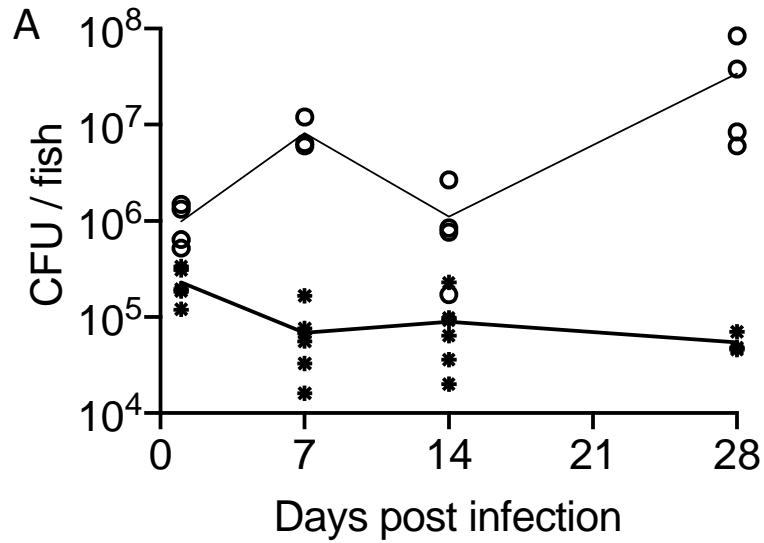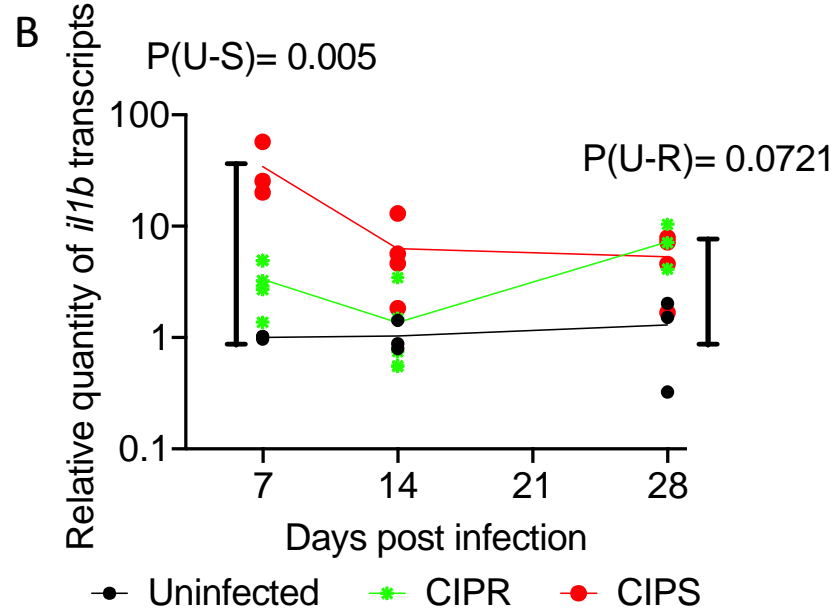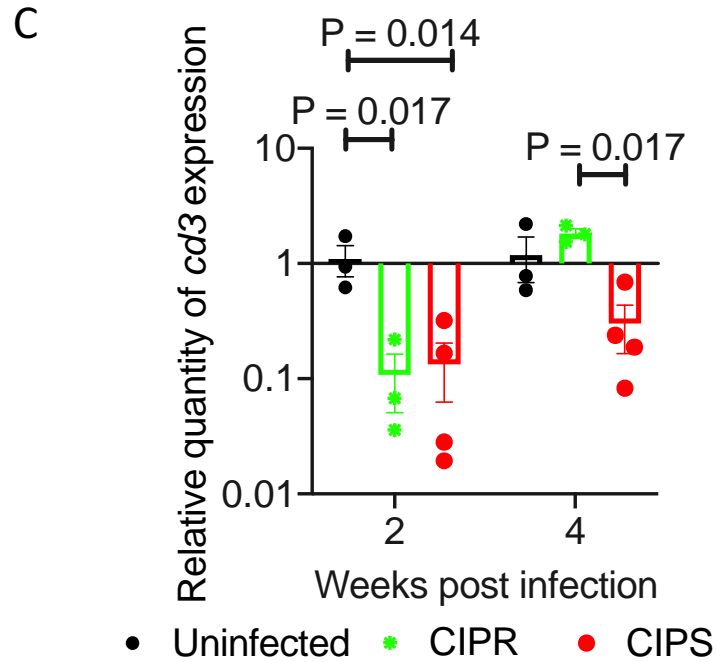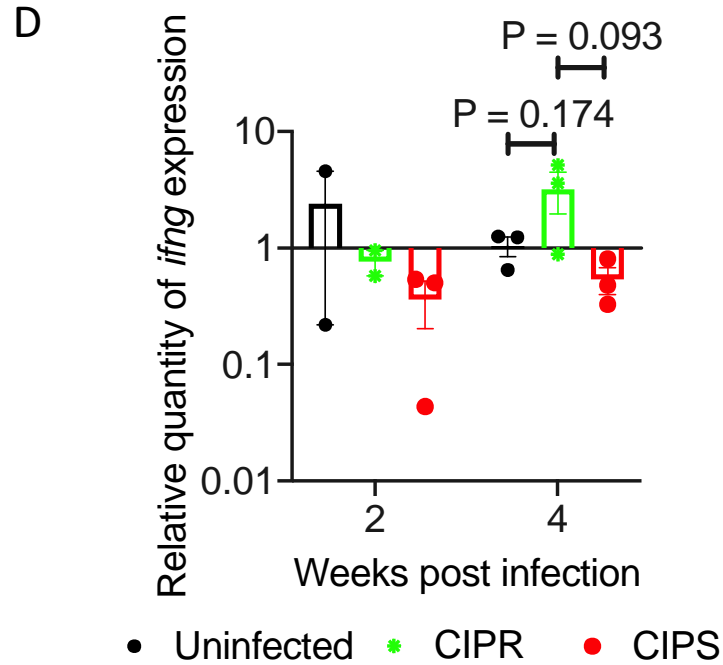



Figure 2

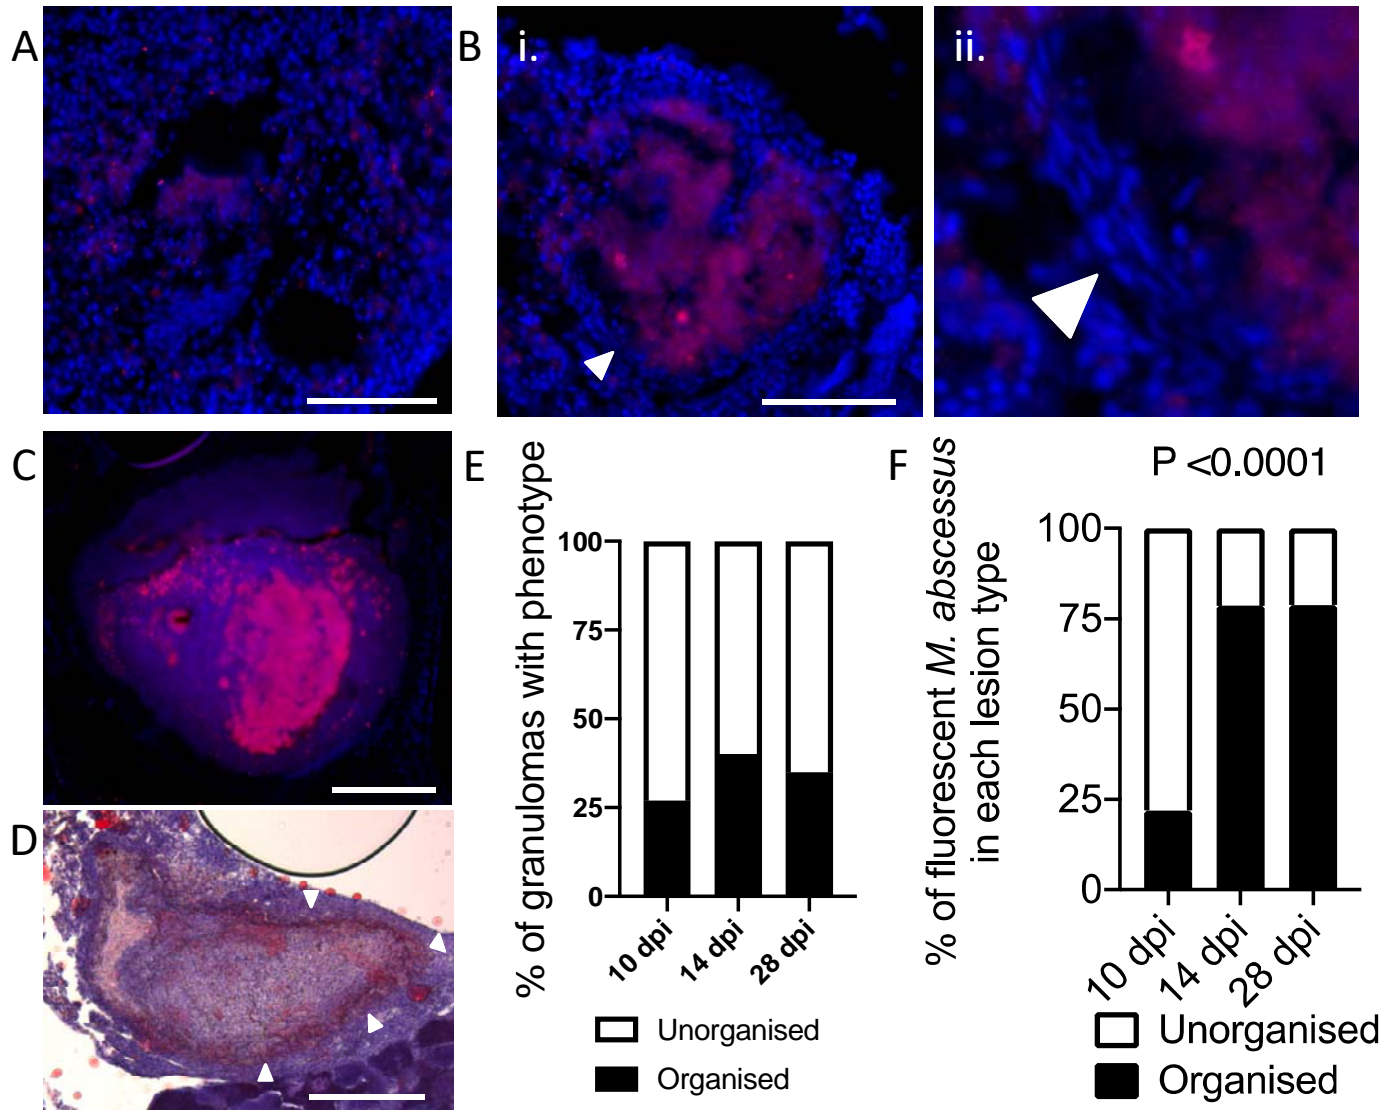

Figure 3

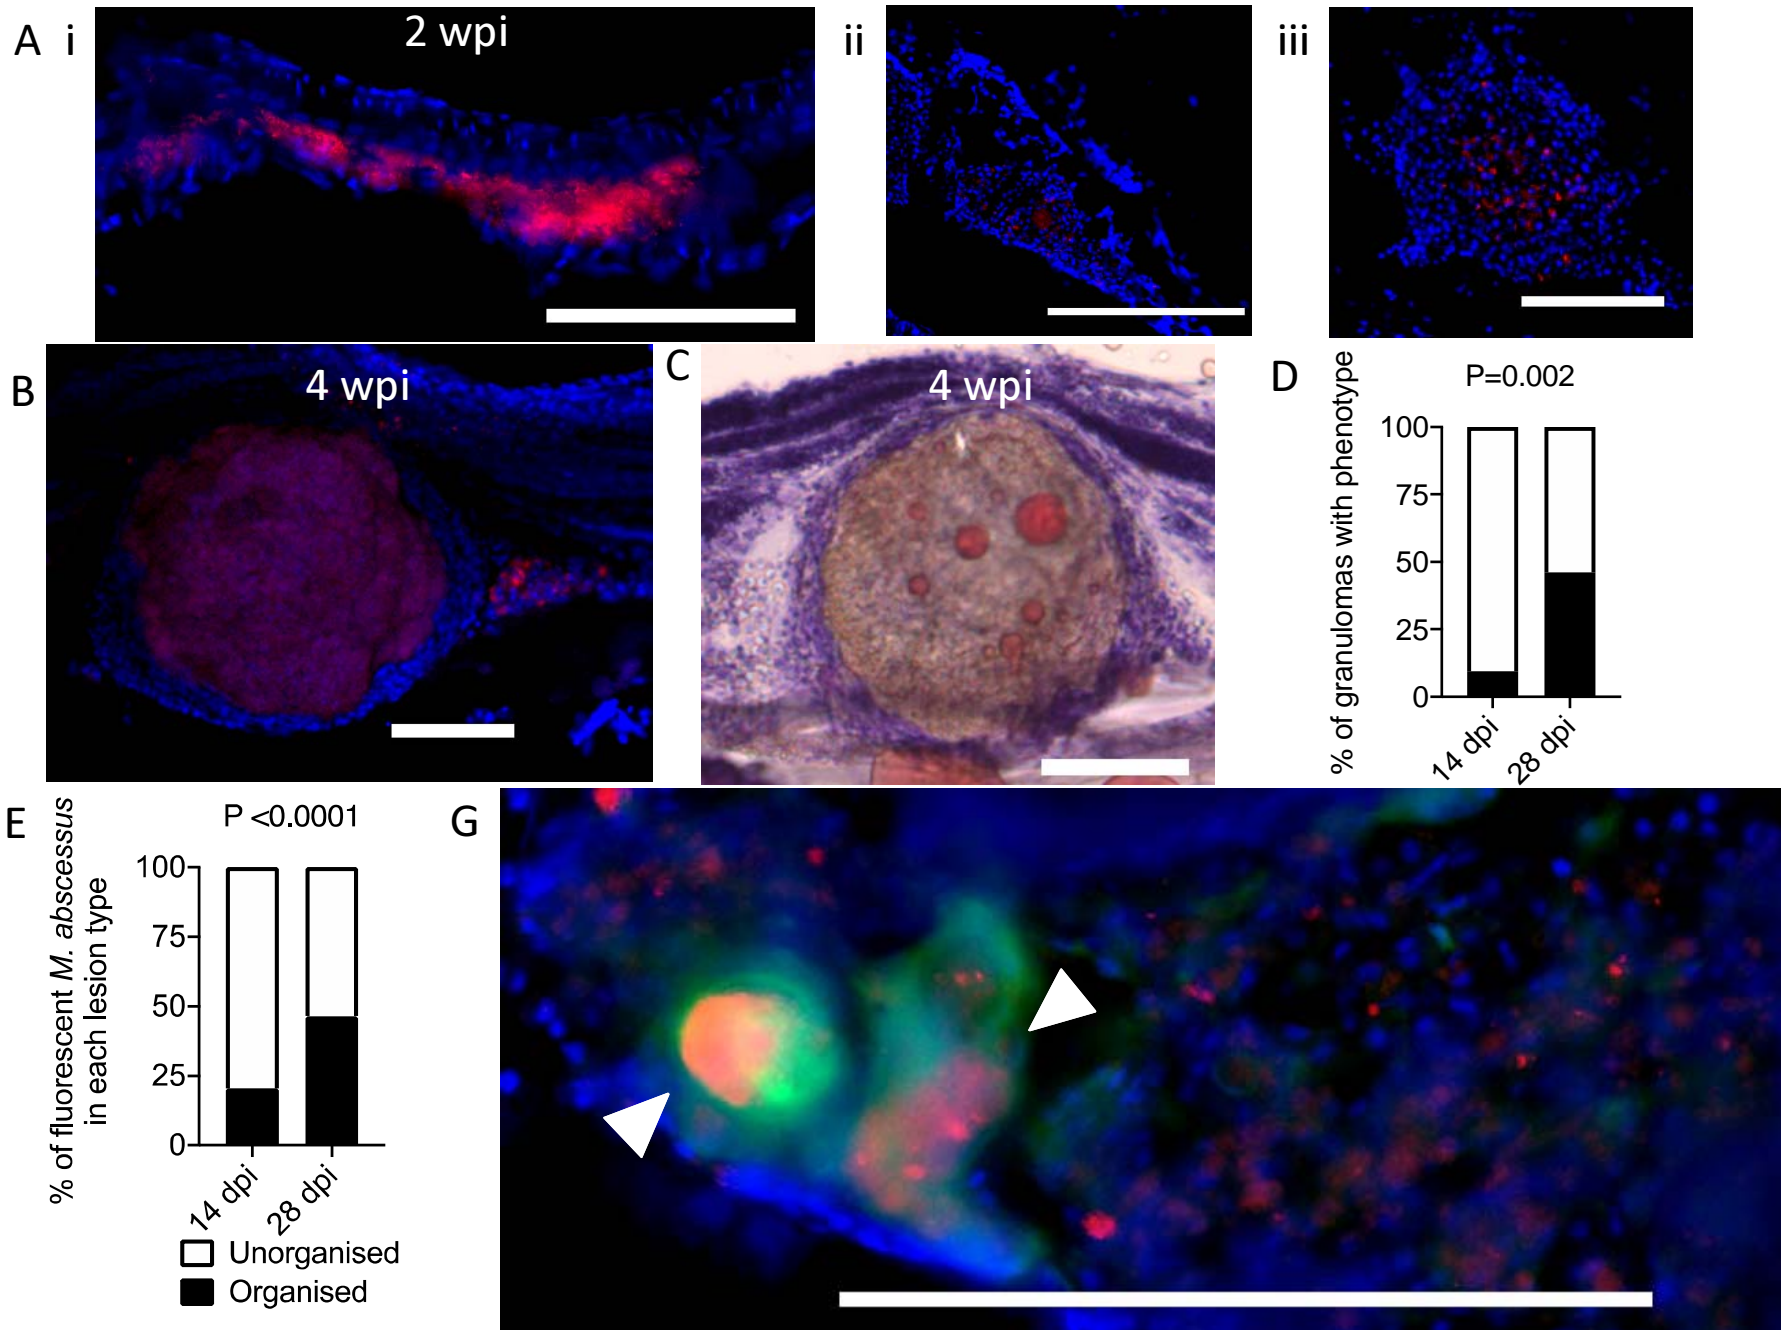

Figure 4

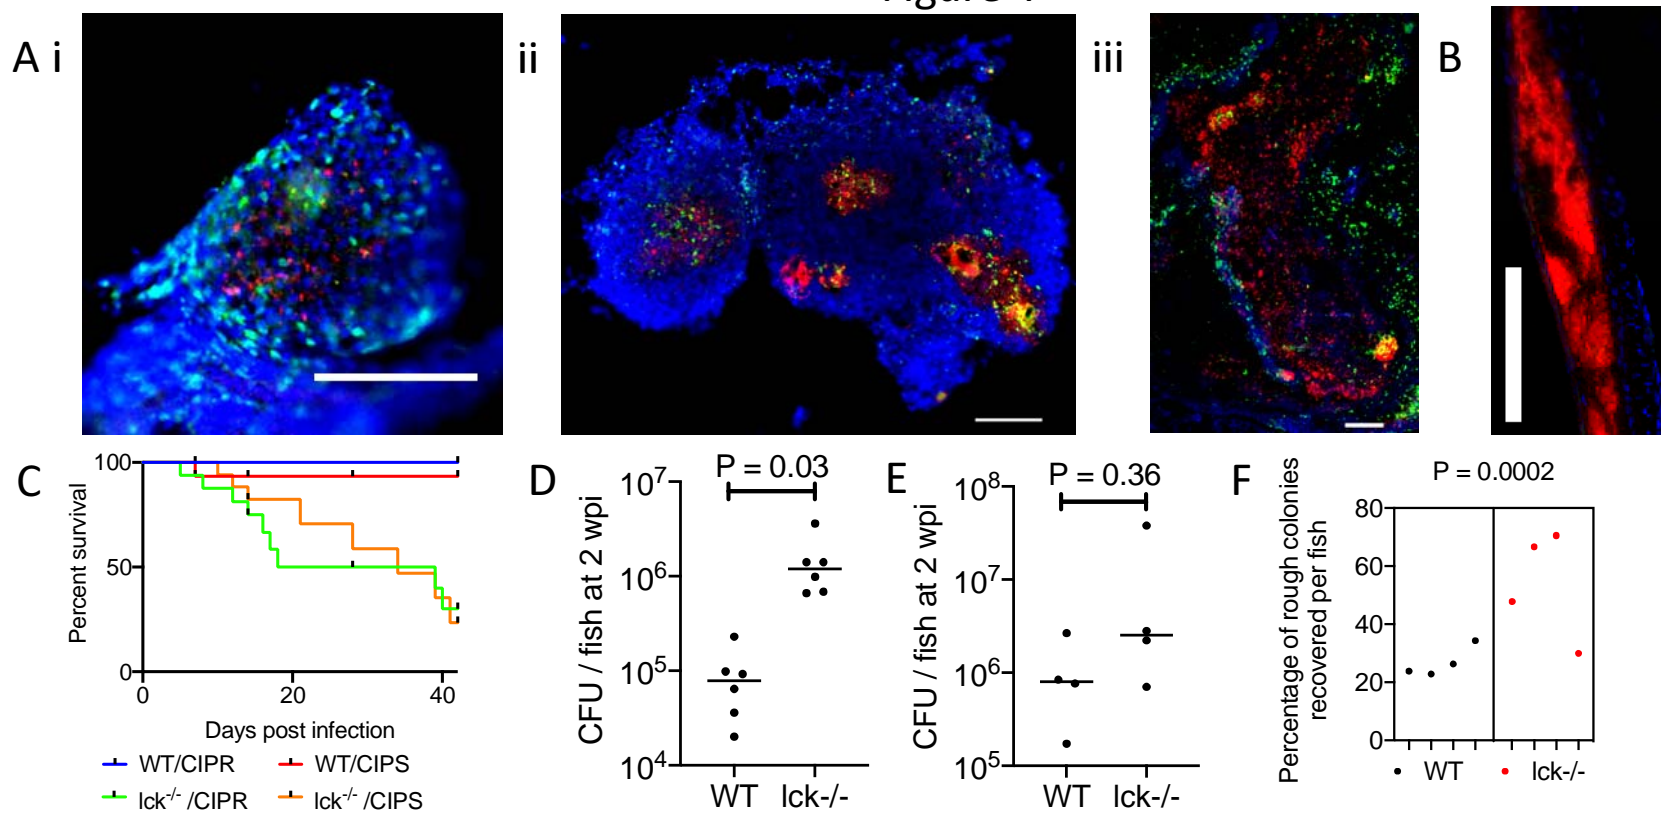

Figure 5

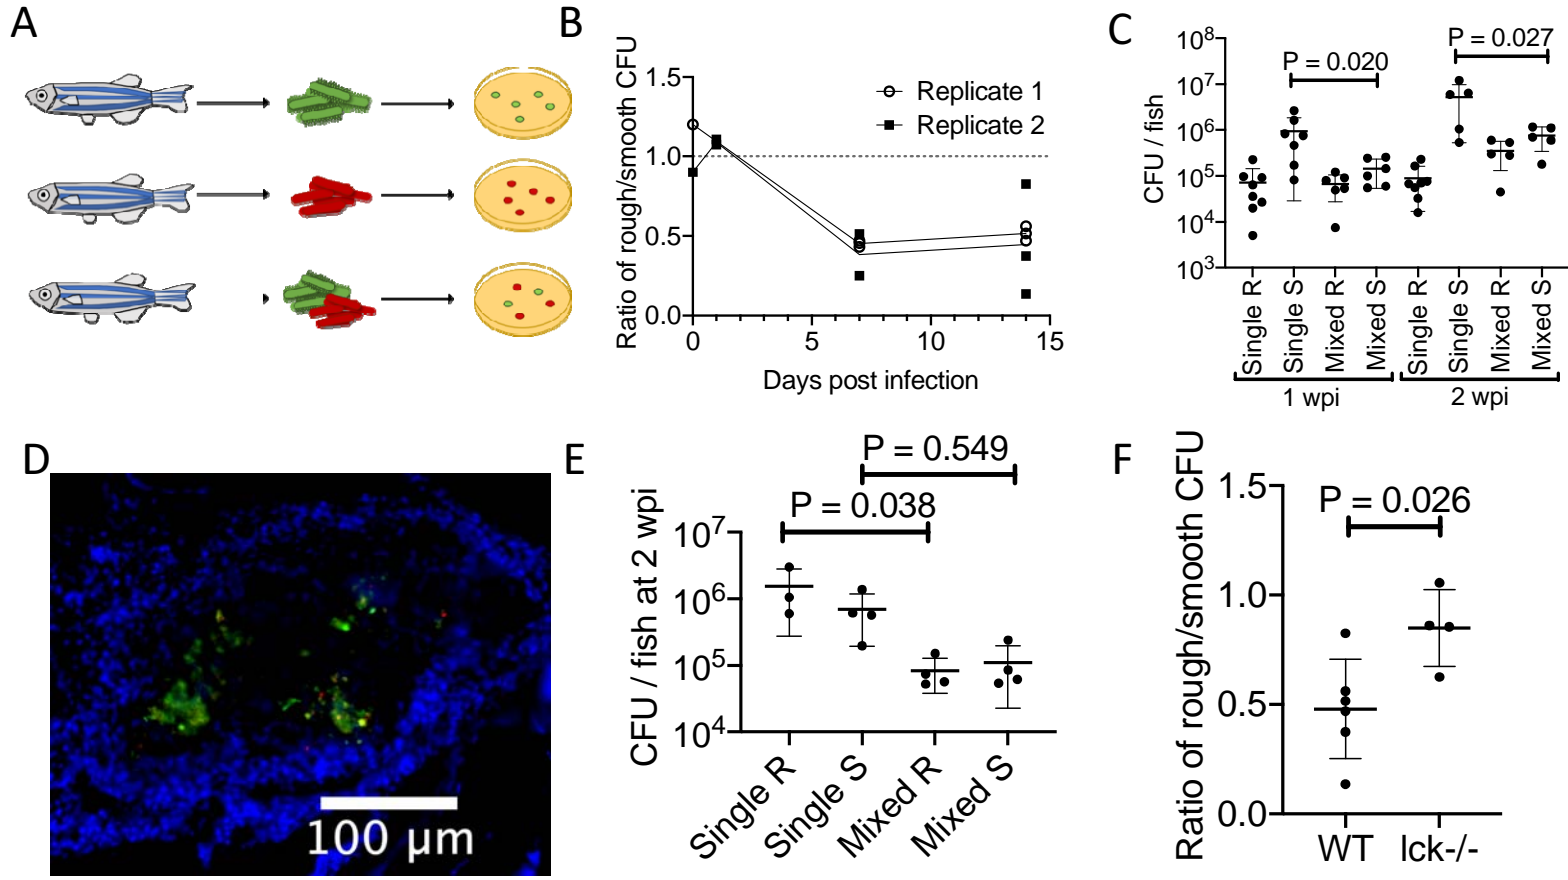

# Graphical Abstract

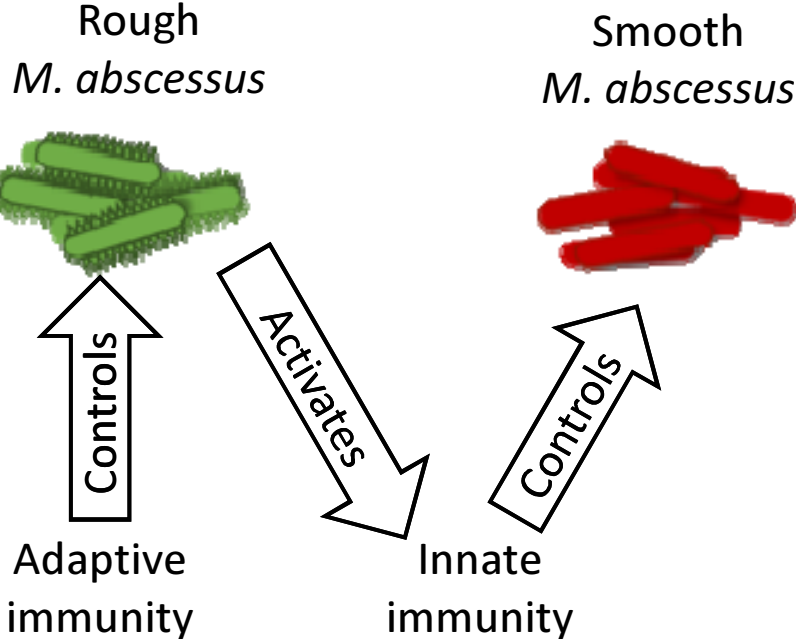

Source: https://www.biorxiv.org/content/10.1101/856948v1.full.pdf
